# Supplementary material
Source: publisher figshare collection journal article supplement (https://gsajournals.figshare.com/articles/dataset/_/6513068)
Supplement: Supplementary file 1 [file 1]

## Sheet: Sheet1
Data type	Experimental species	Symbol/name used in publication	Source – public	Source – published	Source – unpublished	Identifiers	New reagent	Comments
Data type (mandatory) Duplicate rows as needed. Order is flexible, but row titles must be preserved.	Experimental species (mandatory, "NA" okay)	Symbol/name used in publication (mandatory)	Source – public [stock center; company, data repository] (one of D,E,F mandatory)	Source -- published [PMID or 'this paper'] (one of D,E,F mandatory)	Source – unpublished [description, incl. lab of origin] (one of D,E,F mandatory)	Identifiers [format as ID_source:identifier] Separate multiple entries with semi-colon, space	New reagent (mandatory for new entities) Description, progenitor(s)	Comments (optional) Genotypes, purpose of reagent, additional information
strain, strain_background	C. elegans	N2	https://cgc.umn.edu/
strain, strain_background	C. elegans	IB16 ceh-17(np1) I	https://cgc.umn.edu/
strain, strain_background	C. elegans	PS5970 him-5(e1490) syIs197[hsp-16.41::lin-3C, myo-2::dsRed; pha-1(+); KS(+)] V	https://cgc.umn.edu/
strain, strain_background	C. elegans	PS5689 ceh-17(np1) I; him-5(e1490) syIs197 V		20501595
strain, strain_background	C. elegans	PS4886 plc-3(tm1340)/mIn1 [mIs14 dpy-10(e128)] II	https://cgc.umn.edu/
strain, strain_background	C. elegans	PS5131 let-23(sy12)/ mIn1 [mIs14 dpy-10(e128)] II	https://cgc.umn.edu/
strain, strain_background	C. elegans	GR1307 daf-16(mgDf50) I	https://cgc.umn.edu/
strain, strain_background	C. elegans	CB1370 daf-2(e1370) III	https://cgc.umn.edu/
strain, strain_background	C. elegans	CB1372 daf-7(e1372) III	https://cgc.umn.edu/
strain, strain_background	C. elegans	RB2302 daf-7(ok3125) III	https://cgc.umn.edu/
strain, strain_background	C. elegans	DR40 daf-1(m40) IV	https://cgc.umn.edu/
strain, strain_background	C. elegans	KQ251 daf-1(m40) IV; ftEX69[egl-3p::daf-1::GFP;odr-1::dsRED]		18680713
strain, strain_background	C. elegans	KQ380 daf-1(m40) IV; ftEX205[tdc-1p::daf-1::GFP;odr-1::dsRED]		18680713
strain, strain_background	C. elegans	KQ280 daf-1(m40) IV; ftEX98[daf-1p::daf-1::GFP;odr-1::dsRED]		18680713
strain, strain_background	C. elegans	CB1386 daf-5(e1386) II	https://cgc.umn.edu/
strain, strain_background	C. elegans	CB1376 daf-3(e1376) X	https://cgc.umn.edu/
strain, strain_background	C. elegans	ZD907 daf-7(ok3125) III; daf-3(e1376) X		25303524
strain, strain_background	C. elegans	SM190 smg-1(cc546) I; pha-4(zu225) V	https://cgc.umn.edu/
strain, strain_background	C. elegans	CVB20 daf-7(e1372) III; him-5(e1490) syIs197[hsp-16.41::lin-3C, myo-2::dsRed; pha-1(+); KS(+)] V		this paper
strain, strain_background	C. elegans	KQ361 tdc-1(ok914); daf-7(e1372)		18680713
strain, strain_background	C. elegans	KQ362 daf-7(e1372); tbh-1(ok1196)		18680713
strain, strain_background	C. elegans	KQ1366 rict-1(ft7) II	https://cgc.umn.edu/
strain, strain_background	C. elegans	RB1206 rsks-1(ok1255) III	https://cgc.umn.edu/
strain, strain_background	C. elegans	QV225 skn-1(zj15) IV	https://cgc.umn.edu/
strain, strain_background	E. coli HT115	daf-15 RNAi bSEM912		18804378
strain, strain_background	E. coli HT115	let-363 RNAi Ahringer RNAi library I-9A17	Source BioScience
strain, strain_background	E. coli HT115	pha-4 RNAi ORF-RNAi library (Vidal) 11053 B3	Source BioScience
