# Supplementary material
Source: publisher figshare collection journal article supplement (https://gsajournals.figshare.com/articles/dataset/_/6513068)
Supplement: Supplementary file 2 [file 1]

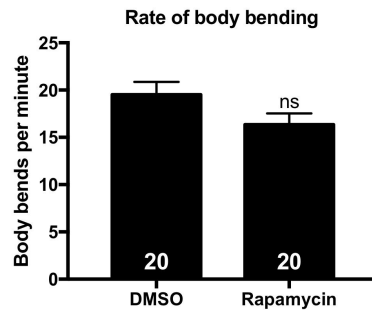

**Figure S6, related to Figure 5. Rapamycin exposure does not induce hyperactivity.** Well-fed animals were exposed to either 200 $\mu$ M Rapamycin or DMSO control for 6 hours. At the end of the six-hour exposure, animals were moved to freshly seeded plates and the rate of body bending was examined after 5 min of recovery. A body bend was defined as the completion of a full sine wave. Rapamycin-treated animals exhibit similar levels of locomotor activity to DMSO-treated control animals. The total number of animals examined is indicated at the bottom of each bar. Error bars represent SEM. ns=not significant, Student's t-test.
