# Supplementary material
Source: publisher figshare collection journal article supplement (https://gsajournals.figshare.com/articles/dataset/_/6513068)
Supplement: Supplementary file 3 [file 1]

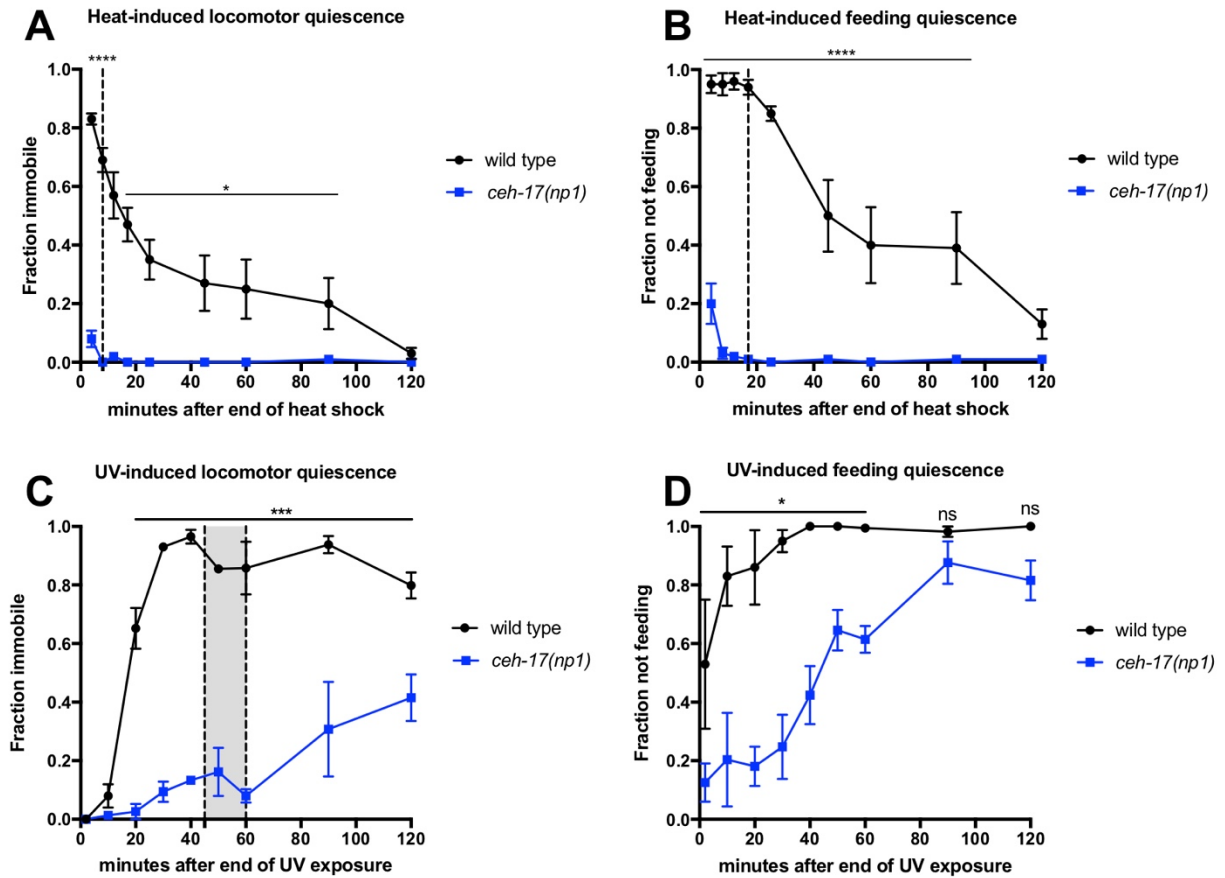

**Figure S1, related to Figure 1. Time courses of SIS in wild-type animals and ALA-defective *ceh-17* mutants.** (A-B) Animals were heat shocked at 37°C for 11 minutes prior to examination of cessation of locomotion (A) and feeding (B) as measures of SIS. This heat shock protocol produces up to 2 hours of behavioral quiescence that is dependent on CEH-17, a transcription factor required for ALA neuron differentiation. (C-D) Animals were exposed to UV light for 45 seconds and scored for cessation of locomotion (C) and feeding (D) as measures of SIS. This protocol induces a long period of locomotor and feeding quiescence that is partly CEH-17-dependent. (A-D) Dotted lines indicate the time points used in single time point assays of SIS. Mean and  $\pm$  SEM of a minimum of four trials of at least 20 animals per trial are shown. \*\*\*\* $p < 0.0001$ , \*\*\* $p \leq 0.001$ , \* $p < 0.05$ , ns= not significant, multiple t-tests with Holm-Sidak correction.
