# Supplementary material
Source: publisher figshare collection journal article supplement (https://gsajournals.figshare.com/articles/dataset/_/6513068)
Supplement: Supplementary file 4 [file 1]

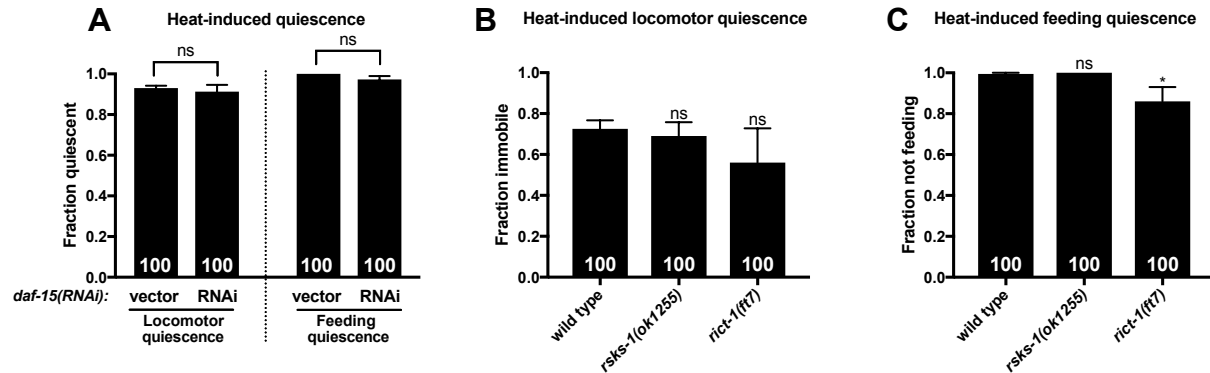

**Figure S7, related to Figure 5. The SIS-promoting effect of TOR signaling is not attributable solely to TORC1 or TORC2.** Animals were heat shocked at 37°C for 11 minutes and examined for locomotor and feeding quiescence as measures of SIS. (A) The TORC1 component DAF-15 is not required to promote SIS. RNAi-sensitized animals were fed bacteria expressing *daf-15 dsRNA* or an empty vector. (B,C) Animals lacking either the TORC1 component RSKS-1 or the TORC2 component RICT-1 show wild-type SIS at the level of locomotor quiescence (B) and animals lacking the TORC2 component RICT-1 exhibit a mild but significant defect in feeding quiescence (C). The total number of animals examined is indicated at the bottom of each bar. Error bars represent SEM (25 animals per trial). \* $p < 0.05$ , ns = not significant vs. wild type (unless otherwise indicated by connecting bars on graph), two-way Anova with Sidak's multiple comparisons test (A) or one-way Anova with Dunnett's multiple comparisons test (B-C).
