# Supplementary material
Source: publisher figshare collection journal article supplement (https://gsajournals.figshare.com/articles/dataset/_/6513068)
Supplement: Supplementary file 5 [file 1]

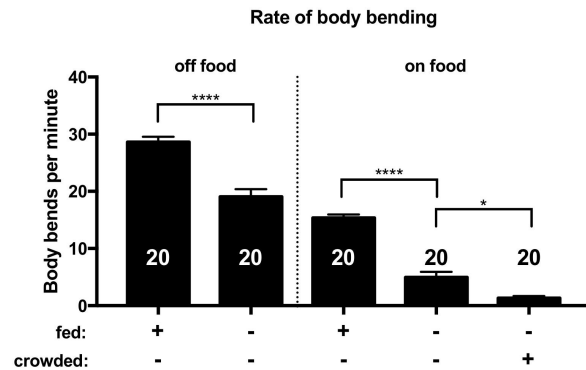

**Figure S2, related to Figures 1 and 2. Long-term food deprivation reduces locomotor activity.** The rate of body bending in 24-hour food-deprived animals and well-fed controls were examined either in the absence of food or after the reintroduction of food. A body bend was defined as the completion of a full sinusoidal curve. In the absence of food, animals deprived of food for 24 hours exhibit decreased locomotor activity compared to fed animals (see left of dotted line). In the presence of food, food-deprived animals grown at low or high population density exhibit significantly reduced locomotor activity compared to fed animals. The total number of animals examined is indicated at the bottom of each bar. Error bars represent SEM. \*\*\*\* $p < 0.0001$ , \* $p < 0.05$ , one-way Anova with Tukey's multiple comparisons test.
