# Supplementary material
Source: publisher figshare collection journal article supplement (https://gsajournals.figshare.com/articles/dataset/_/6513068)
Supplement: Supplementary file 6 [file 1]

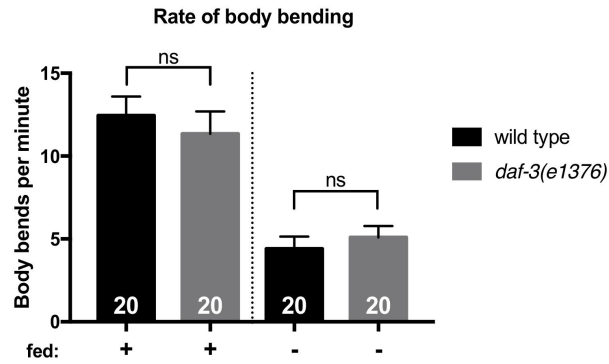

**Figure S5, related to Figure 4. Reduced function in DAF-3/Co-SMAD does not induce hyperactivity.** The rate of body bending in well-fed and 24-hour food-deprived *daf-3(rf)* animals was examined in the presence of food. A body bend was defined as the completion of a full sinusoidal waveform. *daf-3(rf)* mutants exhibit similar locomotor activity compared to wild-type controls both in the fed and food-deprived state. The total number of animals examined is indicated at the bottom of each bar. Error bars represent SEM. ns= not significant, one-way Anova with Sidak's multiple comparisons test.
