# Supplementary material
Source: publisher figshare collection journal article supplement (https://gsajournals.figshare.com/articles/dataset/_/6513068)
Supplement: Supplementary file 7 [file 1]

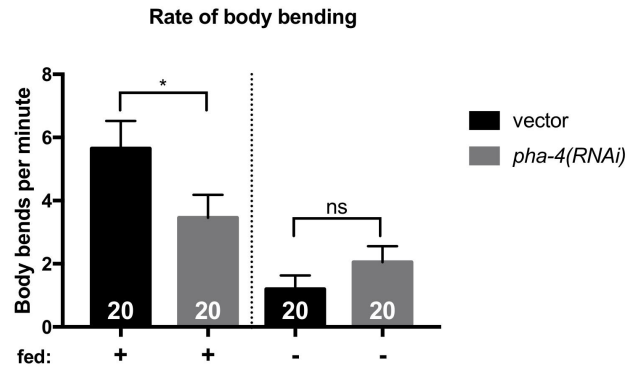

**Figure S8, related to Figure 5. Inactivation of PHA-4 by RNAi does not decrease locomotor activity in food-deprived animals.** RNAi-sensitized animals were fed bacteria expressing *pha-4 dsRNA* or an empty vector. The rate of body bending in well-fed and 24-hour food-deprived animals was examined in the presence of food. A body bend was defined as the completion of a full sinusoidal wave. Well-fed *pha-4(RNAi)* animals exhibit decreased locomotor activity compared to vector controls. Food-deprived *pha-4(RNAi)* animals exhibit similar levels of locomotor activity compared to vector controls. The total number of animals examined is indicated at the bottom of each bar. Error bars represent SEM. \* $p < 0.05$ , ns= not significant, one-way Anova with Sidak's multiple comparisons test.
