# Supplementary material
Source: publisher figshare collection journal article supplement (https://gsajournals.figshare.com/articles/dataset/_/6513068)
Supplement: Supplementary file 8 [file 1]

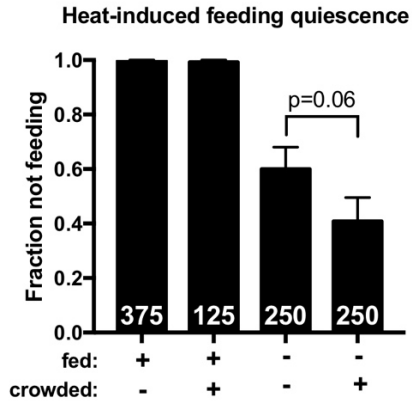

**Figure S3, related to Figure 2. Crowding mildly enhances the sleep-suppressing effect of food deprivation.** In the presence of abundant food, crowding has a no impact on heat-induced feeding quiescence, similar to the result for locomotor quiescence (Figure 2A). In the absence of food, crowding appears to suppress feeding quiescence, similar to its effect on locomotor quiescence (Figure 2A), but the effect is not quite significant ( $p=0.062$ , one-tailed Student's t-test). Animals were deprived of food and/or crowded as described in methods. Animals were heat shocked at 37°C for 11 minutes immediately after the reintroduction of food and monitored for cessation of feeding as a measure of stress-induced sleep. The total number of animals examined is indicated at the bottom of each bar. Error bars represent SEM (25 animals per trial).
